# Supplementary material
Source: MDPI journal article supplement (https://www.mdpi.com/2411-5142/8/3/131)
Supplement: s1 [file s1]

**Supplementary Table S1.** Results of Kolmogorov Smirnov test (KS) for the total sample of participants

|                    | Kolmogorov Smirnov test |                 |
|--------------------|-------------------------|-----------------|
|                    | Max D                   | <i>p</i> -value |
| Body height (cm)   | 0.12                    | <i>p</i> < 0.10 |
| Body mass (kg)     | 0.09                    | <i>p</i> < 0.15 |
| Body mass index    | 0.12                    | <i>p</i> < 0.10 |
| Broad jump (cm)    | 0.08                    | <i>p</i> > 0.20 |
| Sit-and-reach (cm) | 0.08                    | <i>p</i> > 0.20 |
| Sit-ups (number)   | 0.06                    | <i>p</i> > 0.20 |
| Beep test (level)  | 0.07                    | <i>p</i> > 0.20 |
| Step count         | 0.04                    | <i>p</i> > 0.20 |
